# Supplementary material for: Metasurface inverse designed by deep learning for quasi-entire terahertz wave absorption
Source: Royal Society of Chemistry journal article supplement (doi:10.1039/d3nr04974d), 2024-01-01
Supplement: d3nr04974d1.pdf [file d3nr04974d1.pdf]

## **Metasurface inverse designed by deep learning for quasi-entire terahertz wave absorption: supporting information**

*Zhipeng Ding<sup>a</sup>, Wei Su<sup>a\*</sup>, Yinlong Luo<sup>a</sup>, Lipengan Ye<sup>a</sup>, Wenlong Li<sup>a</sup>, Yuanhang Zhou<sup>a</sup>, Jianfei Zou<sup>a</sup>, Bin Tang<sup>b</sup>, and Hongbing Yao<sup>a\*\*</sup>*

<sup>a</sup>Hohai University, College of Science, 211100, Nanjing, China

<sup>b</sup>School of Microelectronics and Control Engineering, Changzhou University, Changzhou 213164, China

\*E-mail: [opticsu@hhu.edu.cn](mailto:opticsu@hhu.edu.cn).

\*\*E-mail: [alenyao@hhu.edu.cn](mailto:alenyao@hhu.edu.cn).

## 1. Simulation setup

In this study, the absorption characteristics of UTWMA were investigated using the finite-difference time-domain (FDTD) method, employing periodic boundary conditions in both  $x$ - and  $y$ -directions, and a perfectly matched layer (PML) is set in the  $z$ -direction for numerical solution. The wave source is set to plane wave. The incident wave frequency was set within the range of 0.1 - 10 THz, and the mesh accuracy was set to 6, with additional mesh layers added to all GLs to ensure the simulation accuracy. The incident wave was incident vertically along the negative  $z$ -axis, and two monitors were added above the light source and at the bottom of the UTWMA to obtain the reflection  $R(\omega)$  and transmission  $T(\omega)$ , and the absorption  $A(\omega)$  can be obtained according to  $A(\omega) = 1 - R(\omega) - T(\omega)$ . As the Ag layer effectively prevented the downward transmission of the THz wave, the transmitted wave was considered to converge to 0, simplifying the absorption expression further to  $A(\omega) = 1 - R(\omega)$ .

## 2. Table S1

**Table S1.** The range and minimum accuracy of structural parameters of UTWMA.

| Parameter | Range ( $\mu\text{m}$ ) | Minimum accuracy ( $\mu\text{m}$ ) |
|-----------|-------------------------|------------------------------------|
| $d_1$     | 5.0 ~ 40.0              | 0.1 $\mu\text{m}$                  |
| $d_2$     | 8.0 ~ 45.0              | 0.1 $\mu\text{m}$                  |
| $d_3$     | 10.0 ~ 55.0             | 0.1 $\mu\text{m}$                  |
| $h_1$     | 5.0 ~ 50.0              | 0.1 $\mu\text{m}$                  |
| $h_2$     | 1.0 ~ 20.0              | 0.1 $\mu\text{m}$                  |
| $h_3$     | 1.0 ~ 20.0              | 0.1 $\mu\text{m}$                  |
| $h_4$     | 1.0 ~ 20.0              | 0.1 $\mu\text{m}$                  |
| $h_5$     | 0.5                     | -                                  |

## 3. Fig. S1

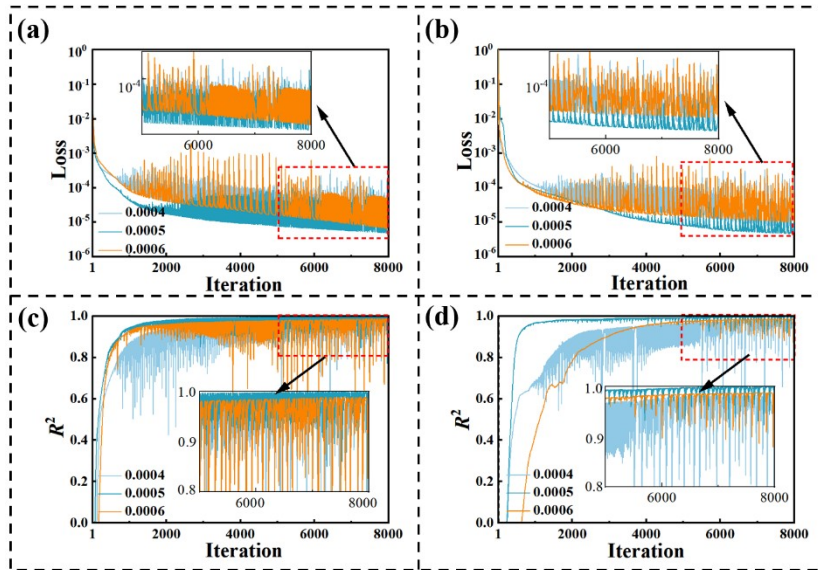

**Fig. S1.** Loss function and  $R^2$  for the training and test sets with different LR based on ANN training. (a-b) Loss function for the training and test sets. (c-d)  $R^2$  for the training and test sets.

#### 4. Fig. S2

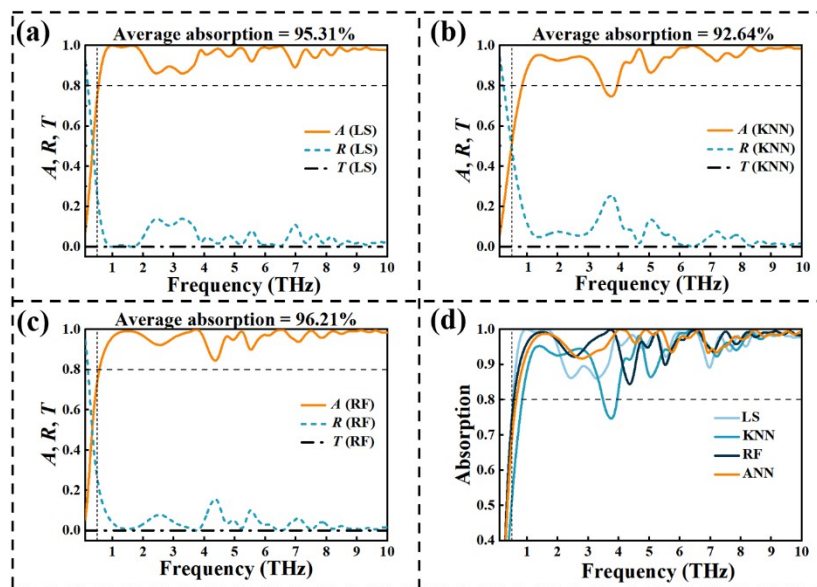

**Fig. S2.** Absorption  $A(\lambda)$ , reflection  $R(\lambda)$ , and transmission  $T(\lambda)$  spectra obtained by inverse design of different algorithm models and comparison of absorption spectra. (a-c) Absorption  $A(\lambda)$ , reflection  $R(\lambda)$ , and transmission  $T(\lambda)$  spectra obtained by LS, KNN, and RF inverse design. (d) Comparison of absorption spectra obtained by inverse design of different algorithm models.

#### 5. Table S2

**Table S2.** Geometric parameters and the predicted average absorptivity of the inverse design output of different algorithmic models

| Types of algorithms            | LS     | KNN    | RF     | ANN    |
|--------------------------------|--------|--------|--------|--------|
| $d_1$ ( $\mu\text{m}$ )        | 19.5   | 13.1   | 13.0   | 10.9   |
| $d_2$ ( $\mu\text{m}$ )        | 49.0   | 44.7   | 43.9   | 44.1   |
| $d_3$ ( $\mu\text{m}$ )        | 48.7   | 49.1   | 43.9   | 44.1   |
| $h_1$ ( $\mu\text{m}$ )        | 49.0   | 48.2   | 49.9   | 49.1   |
| $h_2$ ( $\mu\text{m}$ )        | 8.1    | 7.9    | 7.9    | 8.0    |
| $h_3$ ( $\mu\text{m}$ )        | 6.9    | 13.5   | 13.6   | 13.5   |
| $h_4$ ( $\mu\text{m}$ )        | 22.1   | 8.9    | 14.4   | 11.5   |
| Predicted average absorptivity | 97.51% | 96.08% | 96.04% | 96.31% |
| True average absorptivity      | 95.31% | 92.64% | 96.21% | 96.33% |

#### 6. Supplementary formula

$$MAPE = \frac{1}{n} \sum_{i=1}^n \left| \frac{y_i - \hat{y}_i}{y_i} \right| \times 100\%$$

\\*

MERGEFORMAT (4)

$$RMSE = \sqrt{\frac{\sum_{i=1}^n (y_i - \hat{y}_i)^2}{n}}$$

\\*

MERGEFORMAT (5)

where  $y_i$  and  $\hat{y}_i$  represent the true and predicted values of the average absorptivity of the UTWMA test set, respectively.

### 7. Fig. S3

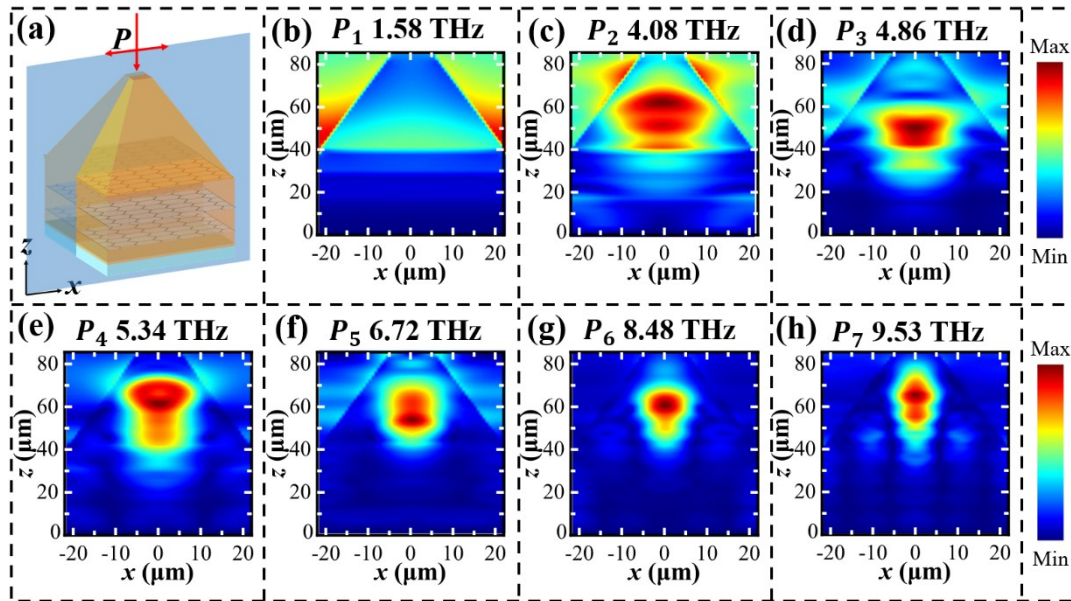

**Fig. S3.** Analysis of the absorbed power of the UTWMA. (a) Schematic representation of the absorbed power along the  $x$ - $z$  plane under normal TE-polarization incident THz wave. (b-h) The absorbed power along the  $x$ - $z$  plane under normal TE-polarization incident THz wave at  $P_1$ ,  $P_2$ ,  $P_3$ ,  $P_4$ ,  $P_5$ ,  $P_6$ , and  $P_7$ .
